# Supplementary material for: A comparison of five Illumina, Ion Torrent, and nanopore sequencing technology-based approaches for whole genome sequencing of SARS-CoV-2
Source: Eur J Clin Microbiol Infect Dis. 2023 Apr 5;42(6):701–13. doi: 10.1007/s10096-023-04590-0 (PMC10075175; doi:10.1007/s10096-023-04590-0)
Supplement: Supplementary file 3 — Supplementary file3 (XLSX 29 KB) [file 10096_2023_4590_MOESM3_ESM.xlsx]

## Sheet: DP_table
Suppl. Table 3. Overview of SNPs and indels called by the different protocols (Q13 threshold). A threshold of 10x depth per base was considered for all platform data except for ONT data, were a 20x depth per base was considered. Per genome position, read depths are shown for respectively reference and alternate calls (DP4; ref forward, ref backward, alternate forward, alternate backward counts).
*; no variant called or no coverage of position.
Sample	Ct-value/Variant position
1	24.06	AmpliSeq_Illumina	EasySeq_Illumina	Ion_AmpliSeq	Custom_ONT	Viral_probe_mNGS_Illumina
	241_C_T	1,0,2,115	913,0,659,374	0,0,231,315	0,0,23,32	2,2,24595,4348
	3037_C_T	3,0,1520,4957	0,0,50,69	3,0,1743,2493	0,0,21,33	0,0,294,225
	14408_C_T	3,0,83,493	0,0,111,1017	1,4,335,646	2,5,651,533	5,0,31723,2348
	20275_G_A	0,1,141,343	0,5,63,90	0,1,435,765	5,4,556,606	2,0,1774,46
	23403_A_G	3,0,6128,223	0,0,12,165	1,2,1491,3009	1,1,378,308	0,1,4062,974
2	33.4	AmpliSeq_Illumina	EasySeq_Illumina	Ion_AmpliSeq	Custom_ONT	Viral_probe_mNGS_Illumina
	1241_T_G	7,0,10,0	*	*	*	*
	1440_G_A	0,0,28,1	*	*	*	*
	2891_G_A	0,1,1,31	*	*	*	*
	4303_TAAAAA_TAAAAAA	3,1,11,0	*	*	*	*
	18143_C_T	*	*	*	*	0,0,23,0
	28054_C_T	*	7,0,0,15	*	133153469427	*
	28329_G_T	17,0,56,32	*	*	*	*
	28657_C_T	52,1,128,2	*	*	*	*
	28881_G_A	*	*	50,199,28,118	*	*
3	26.77	AmpliSeq_Illumina	EasySeq_Illumina	Ion_AmpliSeq	Custom_ONT	Viral_probe_mNGS_Illumina
	241_C_T	0,1,6,818	1865,0,1222,672	0,0,30,60	*	1,0,5093,1272
	3037_C_T	4,1,2611,9174	0,0,38,55	0,0,2066,2623	*	0,0,97,60
	14408_C_T	3,4,100,2891	1,0,99,505	1,3,202,329	2,0,209,180	20,0,11137,997
	21817_ATTT_ATT	*	*	1,2,13,0	*	*
	23403_A_G	1,0,10696,157	0,0,2,59	0,1,2103,3906	0,0,102,71	0,0,1030,275
	24862_A_G	4,0,3720,197	*	0,0,275,345	0,0,18,39	3,4,4987,5937
4	30.03	AmpliSeq_Illumina	EasySeq_Illumina	Ion_AmpliSeq	Custom_ONT	Viral_probe_mNGS_Illumina
	9379_T_A	0,0,3567,2229	0,0,195,0	0,0,369,560	*	0,0,273,256
	11083_G_T	0,1,1923,3183	0,0,34,29	0,0,224,17	*	0,0,2625,797
	14805_C_T	1,0,2021,920	0,0,91,0	1,1,1170,182	2,4,12,5	144,1,26985,6825
	17247_T_C	8,1,14186,220	0,0,47,0	1,4,1336,3391	1,2,12,17	69,80,37161,11164
	22964_A_G	4,5,5550,11387	0,0,62,149	3,2,1344,2080	*	0,0,116,30
	26144_G_T	29,0,6552,0	0,0,80,0	0,0,1201,632	3,3,12,9	0,0,18635,2641
5	20.05	AmpliSeq_Illumina	EasySeq_Illumina	Ion_AmpliSeq	Custom_ONT	Viral_probe_mNGS_Illumina
	241_C_T	0,0,4,3507	1153,0,721,356	0,1,348,341	0,0,88,97	0,0,14,3
	3037_C_T	0,0,1354,5515	0,0,134,144	1,0,2490,3386	0,0,73,92	0,0,2,0
	14408_C_T	23,5,49,2989	0,1,162,1412	5,8,438,826	4,3,335,248	0,0,31,2
	23403_A_G	6,0,10816,186	0,0,48,564	0,0,1871,4212	2,0,259,246	*
6	29.59	AmpliSeq_Illumina	EasySeq_Illumina	Ion_AmpliSeq	Custom_ONT	Viral_probe_mNGS_Illumina
	241_C_T	0,1,3,4564	423,0,259,138	0,0,173,235	0,0,6,12	0,0,44,2
	2558_C_T	1,3,2838,3617	0,0,45,0	0,1,512,886	*	0,0,24,0
	3037_C_T	2,0,2112,7859	0,0,14,5	2,0,3044,3256	*	*
	14408_C_T	21,6,76,4265	7,0,14,133	1,0,127,173	4,3,577,405	1,0,2969,49
	14768_C_T	*	*	*	*	53,1,1507,32
	21817_ATTT_ATT	*	*	10,14,156,0	*	*
	23403_A_G	7,0,9928,142	*	2,2,1494,4389	1,1,323,302	0,0,295,52
	28139_C_A	0,0,4694,6335	0,0,19,0	0,0,2017,353	1,4,529,507	0,0,2938,80
7	16.39	AmpliSeq_Illumina	EasySeq_Illumina	Ion_AmpliSeq	Custom_ONT	Viral_probe_mNGS_Illumina
	241_C_T	0,2,14,3635	2144,0,1457,1425	0,1,4241,5344	*	1,3,17681,3164
	3037_C_T	4,2,2662,9051	0,0,402,561	4,7,13991,21174	*	0,0,118,59
	4002_C_T	0,0,2949,204	0,0,2216,0	1,1,3344,4007	*	0,0,24,0
	10097_G_A	7,2,2156,595	1,2,618,2216	7,16,3239,12487	*	3,1,10649,1428
	13536_C_T	6,0,564,0	0,0,1738,0	54,10,6919,533	*	3,1,48682,17833
	14408_C_T	93,8,81,2778	0,2,465,1964	60,70,5370,10646	*	5,0,28889,2100
	19718_C_T	119,0,130,984	0,0,254,1891	144,41,1515,3921	*	0,0,2477,67
	23403_A_G	2,0,11886,472	0,0,61,866	6,9,17307,33319	*	0,0,3296,626
	23731_C_T	7,3,4658,0	1,0,1386,0	39,46,11262,5148	*	0,0,2340,90
	28881_G_A	4,3,5478,391	1,0,527,1803	6,9,5613,6387	*	4,1,26894,8927
	28882_G_A	9,1,5511,360	0,0,528,1803	5,10,5597,6386	*	0,0,26845,8834
	28883_G_C	1,0,5517,371	0,1,528,1802	1,0,5618,6396	*	0,0,26953,8961
8	22.2	AmpliSeq_Illumina	EasySeq_Illumina	Ion_AmpliSeq	Custom_ONT	Viral_probe_mNGS_Illumina
	241_C_T	0,0,0,454	1502,0,1025,612	0,0,121,165	0,0,8,11	0,0,474,75
	3037_C_T	0,0,165,1304	0,0,84,118	0,1,3168,3974	0,0,11,27	*
	4002_C_T	0,0,320,5	0,0,1056,0	0,0,12,14	0,0,147,183	*
	10097_G_A	0,0,153,38	0,0,160,1077	0,1,298,1400	*	0,0,213,12
	13536_C_T	1,0,75,0	0,0,722,0	1,0,184,20	0,0,99,115	0,0,885,92
	14408_C_T	1,0,2,205	0,0,98,730	1,0,113,336	2,3,477,380	0,0,715,66
	19718_C_T	6,0,16,143	0,0,26,591	3,4,61,156	2,0,85,75	0,0,52,7
	23403_A_G	0,0,943,25	0,3,9,167	1,0,2144,3662	1,0,224,254	0,0,64,23
	23731_C_T	2,0,362,0	0,0,666,1	11,1,384,196	1,0,74,41	0,0,54,1
	28881_G_A	0,0,1037,16	0,0,82,730	1,2,665,755	0,0,96,107	0,0,1082,366
	28882_G_A	3,0,1039,14	0,0,82,730	1,4,664,753	2,0,75,107	0,0,1085,366
	28883_G_C	0,0,1043,12	0,0,82,729	0,4,666,753	0,0,88,102	0,0,1086,370
9	13.86	AmpliSeq_Illumina	EasySeq_Illumina	Ion_AmpliSeq	Custom_ONT	Viral_probe_mNGS_Illumina
	241_C_T	0,2,13,4255	2008,0,1371,1977	0,0,668,623	0,0,103,116	2,0,16801,2180
	3037_C_T	6,1,2905,11014	0,0,692,546	1,2,2277,2444	0,0,50,53	0,0,96,29
	4002_C_T	0,0,2014,153	0,0,2304,0	0,0,344,137	0,1,205,226	0,0,33,1
	10097_G_A	8,0,2285,677	0,0,529,2621	0,3,223,940	1,4,18,26	3,0,7555,882
	13536_C_T	4,0,560,1	1,0,2120,1	6,2,416,27	0,0,101,115	3,1,32724,6496
	14408_C_T	131,4,65,2841	0,0,417,1990	8,10,323,378	1,2,250,173	1,1,19671,1230
	19718_C_T	61,0,145,953	0,0,454,1994	25,7,87,281	0,0,42,49	0,0,2225,62
	23403_A_G	3,0,12788,475	0,0,112,1732	1,0,1827,4411	0,0,223,227	1,0,2865,430
	23731_C_T	7,5,4193,1	0,0,1398,0	3,0,1549,833	2,0,168,128	0,0,2034,67
	28881_G_A	3,2,5823,448	0,1,1454,2279	1,1,712,682	0,0,90,112	7,1,19592,6052
	28882_G_A	5,1,5843,434	0,0,1454,2281	0,2,711,681	1,0,72,109	2,1,19606,5992
	28883_G_C	0,0,5844,450	0,1,1454,2280	0,0,713,683	0,0,77,107	1,0,19650,6121
10	21.12	AmpliSeq_Illumina	EasySeq_Illumina	Ion_AmpliSeq	Custom_ONT	Viral_probe_mNGS_Illumina
	241_C_T	0,1,4,2223	2029,0,1302,1114	0,1,280,345	0,0,307,313	0,0,2225,259
	1594_C_T	4,0,1476,47	0,1,7,217	0,0,2631,1858	12,1,663,501	0,0,53,1
	3037_C_T	2,0,754,4922	0,0,211,384	1,0,1775,2381	1,0,154,160	0,0,43,15
	11109_C_T	14,381,1187,67	0,73,1272,0	17,21,271,319	21,4,549,622	0,0,316,196
	14408_C_T	23,2,26,1220	0,0,307,2213	3,4,372,702	5,1,716,653	4,0,13151,14
	23403_A_G	0,0,4585,101	0,0,21,316	0,1,1605,3636	0,0,543,588	0,0,2117,400
	25563_G_T	0,0,3128,3534	0,0,514,5	6,0,3833,1688	1,0,209,254	0,0,62966,6329
11	23.42	AmpliSeq_Illumina	EasySeq_Illumina	Ion_AmpliSeq	Custom_ONT	Viral_probe_mNGS_Illumina
	241_C_T	0,0,0,730	1829,1,1223,750	0,1,195,344	*	0,0,54,8
	3037_C_T	0,0,383,1243	0,0,137,195	1,0,2781,3383	*	*
	3373_C_A	0,0,664,18	0,0,103,136	0,0,308,57	0,0,261,192	*
	5672_C_T	1,30,616,91	*	2,4,2502,2109	0,5,158,138	0,0,33,5
	14408_C_T	3,1,12,752	0,0,195,1073	2,2,133,215	0,0,133,104	0,0,138,3
	23403_A_G	0,0,1673,27	0,0,17,245	0,3,2243,5474	1,0,77,77	0,0,15,3
	28881_G_A	0,0,1144,17	0,0,142,1170	0,0,339,504	0,0,75,65	0,0,108,5
	28882_G_A	2,0,1145,16	0,0,142,1170	0,2,339,502	0,0,66,63	0,0,108,5
	28883_G_C	0,0,1148,16	0,0,142,1171	0,0,339,504	0,1,68,61	0,0,109,4
	29585_C_T	5,0,457,9	0,0,3183,0	43,10,190,370	*	*
12	24.41	AmpliSeq_Illumina	EasySeq_Illumina	Ion_AmpliSeq	Custom_ONT	Viral_probe_mNGS_Illumina
	241_C_T	0,0,3,1816	1594,0,1100,676	0,0,259,307	0,0,49,54	0,0,24,0
	1059_C_T	1,2,421,1829	0,8,202,0	0,0,335,1107	2,2,547,576	0,0,0,199
	1302_C_T	0,2,409,2880	0,0,206,0	0,3,1303,1836	0,0,523,672	*
	3037_C_T	1,0,427,3151	0,0,172,227	0,2,1648,2391	0,0,36,38	0,0,0,9
	6454_G_T	0,1,529,2203	1,39,163,0	0,0,1034,673	0,0,1,2	0,0,271,29
	14408_C_T	16,3,14,700	0,0,290,1609	4,1,380,883	3,2,622,409	0,0,661,130
	23403_A_G	0,0,2475,67	0,0,15,185	0,0,1368,3205	3,0,330,357	0,0,15,0
	25563_G_T	2,0,1447,2249	0,0,280,2	0,0,2797,1469	0,1,75,96	0,0,19,57
13	22.49	AmpliSeq_Illumina	EasySeq_Illumina	Ion_AmpliSeq	Custom_ONT	Viral_probe_mNGS_Illumina
	241_C_T	0,1,7,2540	1565,0,961,913	0,0,393,411	*	3,0,3350,1262
	3037_C_T	0,0,1462,5342	0,0,133,234	2,2,1870,2725	*	0,0,98,74
	4002_C_T	1,0,2012,53	0,0,1100,0	0,0,33,42	0,0,36,46	0,0,30,3
	10097_G_A	1,1,1222,323	4,0,192,1271	0,0,240,789	*	0,0,2067,573
	13536_C_T	2,0,553,0	0,0,1133,0	1,0,166,20	0,0,19,17	1,0,10166,5260
	14408_C_T	21,6,40,2357	1,0,240,1639	2,0,63,84	0,1,72,45	3,0,8531,755
	19718_C_T	45,0,142,971	0,0,74,641	8,4,39,71	0,0,12,15	0,1,836,106
	23403_A_G	3,0,6454,130	0,0,12,209	1,0,1106,3221	0,0,36,35	0,0,592,207
	23731_C_T	4,4,2553,1	1,0,1001,0	2,4,562,314	0,0,18,14	0,0,383,48
	28881_G_A	4,0,4299,140	0,0,111,912	2,0,494,539	*	0,0,5938,2441
	28882_G_A	1,0,4315,127	0,0,111,912	2,0,490,539	*	0,0,5924,2430
	28883_G_C	0,0,4325,122	0,0,111,912	0,0,494,539	*	0,0,5969,2459
14	29.09	AmpliSeq_Illumina	EasySeq_Illumina	Ion_AmpliSeq	Custom_ONT	Viral_probe_mNGS_Illumina
	241_C_T	0,0,0,176	1369,0,905,284	0,0,213,316	*	0,0,6824,1075
	2558_C_T	0,0,163,123	0,0,285,0	0,0,409,657	*	0,0,45,30
	3037_C_T	0,0,154,309	0,0,45,33	0,0,1891,1821	*	0,0,5,27
	14408_C_T	0,0,3,201	0,0,90,393	0,0,177,500	0,4,247,171	0,0,1900,107
	21817_ATTT_ATT	*	*	12,32,185,0	*	*
	23403_A_G	1,0,437,8	0,0,1,52	0,0,1193,1838	0,0,39,40	0,0,360,197
	28139_C_A	1,0,275,270	0,0,102,0	0,1,2586,484	3,7,744,731	0,0,1754,186
15	21.01	AmpliSeq_Illumina	EasySeq_Illumina	Ion_AmpliSeq	Custom_ONT	Viral_probe_mNGS_Illumina
	241_C_T	0,3,6,4299	1767,1,1170,1236	0,0,237,266	0,1,95,127	1,0,4616,1340
	3037_C_T	0,0,2021,8898	0,0,287,436	2,0,1225,1831	1,0,80,86	0,0,98,58
	4002_C_T	1,0,2807,112	0,0,1640,0	0,0,297,264	0,0,383,414	0,0,18,5
	10097_G_A	0,0,1682,433	1,0,313,1743	2,0,223,1018	*	2,3,2440,541
	13536_C_T	9,0,620,0	0,0,1846,0	2,0,361,24	1,0,223,263	0,1,12869,6048
	14408_C_T	101,1,67,2623	0,0,427,2610	3,5,385,761	0,4,497,429	0,0,8205,655
	19718_C_T	101,0,133,998	0,0,169,938	12,2,113,252	3,0,89,98	1,0,831,107
	23403_A_G	4,0,10618,273	0,0,31,534	0,2,1327,2635	0,1,385,373	0,0,762,206
	23731_C_T	4,6,4135,1	0,0,1415,0	5,1,870,476	1,4,125,106	0,0,465,47
	28881_G_A	6,0,8442,348	0,0,406,1448	0,0,524,550	1,0,137,148	4,0,12230,4122
	28882_G_A	16,0,8452,327	0,0,406,1448	2,0,520,550	0,0,127,145	1,1,12222,4093
	28883_G_C	0,0,8473,330	0,0,406,1448	0,0,524,550	0,2,127,138	0,0,12287,4154
16	24.96	AmpliSeq_Illumina	EasySeq_Illumina	Ion_AmpliSeq	Custom_ONT	Viral_probe_mNGS_Illumina
	1440_G_A	0,0,53,1	*	0,0,542,159	*	*
	2891_G_A	0,0,120,25	0,7,34,0	7,3,1320,1392	*	*
	23525_C_T	1,0,195,249	0,0,79,0	0,2,3316,5423	*	*
17	31.65	AmpliSeq_Illumina	EasySeq_Illumina	Ion_AmpliSeq	Custom_ONT	Viral_probe_mNGS_Illumina
	241_C_T	0,0,0,37	*	0,0,142,165	*	*
	626_G_C	*	*	*	*	0,52,317,2
	3037_C_T	0,0,1,41	*	6,0,565,661	*	*
	5343_C_T	0,0,68,13	*	0,1,147,234	1,1,73,85	*
	9248_G_T	1,0,14,0	*	*	*	*
	10594_C_T	0,0,0,43	*	0,0,99,293	*	*
	14408_C_T	0,0,0,10	0,0,0,27	0,0,41,68	0,2,114,96	0,0,959,3
	15714_C_T	0,0,38,56	*	2,0,204,892	10,3,2161,1683	0,0,295,1
	22028_GAGTTCA_G	*	4,0,9,0	*	*	*
	22578_G_A	*	0,5,10,0	*	*	*
	23403_A_G	0,0,183,2	*	1,0,475,1234	0,0,31,23	0,0,108,47
	24914_G_C	*	*	*	*	0,0,0,118
	27046_C_T	0,0,0,48	*	0,0,105,47	*	*
	27976_A_T	0,0,166,0	*	1,0,887,244	1,0,64,57	0,1,8,1381
	28665_T_C	*	*	*	*	11,6,0,165
	28881_G_A	0,0,113,1	*	1,0,204,185	0,0,33,31	*
	28882_G_A	0,0,113,1	*	1,0,204,185	0,1,27,30	*
	28883_G_C	0,0,113,0	*	1,0,204,185	0,0,28,28	*
18	23.85	AmpliSeq_Illumina	EasySeq_Illumina	Ion_AmpliSeq	Custom_ONT	Viral_probe_mNGS_Illumina
	241_C_T	0,0,1,1567	238,0,169,166	0,0,179,172	0,0,19,21	1,0,15616,3521
	3037_C_T	1,0,702,2718	0,0,19,13	0,1,1387,2204	0,0,17,10	0,0,57,216
	10273_T_C	1,0,1479,1631	15,0,0,42	4,0,1840,921	4,0,422,424	0,0,1409,643
	14408_C_T	1,1,19,1317	0,0,21,743	0,2,276,481	3,2,325,259	2,0,8811,1131
	23403_A_G	0,0,4773,81	0,0,2,32	0,0,1619,2874	0,0,304,300	0,0,2252,1422
	27046_C_T	0,1,86,1553	0,0,1,66	1,2,247,228	*	0,0,1850,2130
	28881_G_A	4,0,4916,79	0,0,48,366	1,0,476,754	0,0,66,112	0,0,23303,23200
	28882_G_A	3,0,4940,51	0,0,48,366	2,1,475,753	0,0,57,109	0,2,23376,23005
	28883_G_C	0,0,4939,52	0,0,48,366	1,1,476,753	0,1,57,107	0,0,23494,23416
	29751_G_C	1,0,10,1464	*	1,0,404,1125	*	0,0,81,242
19	27.25	AmpliSeq_Illumina	EasySeq_Illumina	Ion_AmpliSeq	Custom_ONT	Viral_probe_mNGS_Illumina
	241_C_T	0,0,0,16	*	0,0,64,90	*	*
	3037_C_T	0,0,39,61	*	0,0,1158,1669	*	*
	10273_T_C	0,0,66,20	*	0,0,1376,465	7,1,461,543	*
	14408_C_T	0,0,0,56	0,0,1,10	2,0,298,408	1,1,181,107	*
	14438_T_C	*	*	*	*	0,0,23,0
	23403_A_G	0,0,410,6	*	2,2,1209,2893	0,0,142,157	*
	27046_C_T	0,0,2,112	*	0,0,404,419	*	0,0,0,17
	28881_G_A	0,0,72,2	*	0,1,281,442	0,1,148,129	0,0,158,0
	28882_G_A	0,0,74,1	*	0,3,279,440	0,0,129,126	0,0,159,0
	28883_G_C	0,0,74,1	*	0,2,281,441	0,6,126,121	0,0,158,0
	29751_G_C	0,0,1,26	*	0,1,266,753	*	*
20	28.74	AmpliSeq_Illumina	EasySeq_Illumina	Ion_AmpliSeq	Custom_ONT	Viral_probe_mNGS_Illumina
	1440_G_A	0,0,38,0	*	*	*	*
	2891_G_A	0,0,205,56	*	0,0,86,49	*	*
	13468_C_T	*	*	*	0,1,73,49	*
	23525_C_T	0,0,325,394	*	0,1,366,778	0,0,6,15	*
21	28.04	AmpliSeq_Illumina	EasySeq_Illumina	Ion_AmpliSeq	Custom_ONT	Viral_probe_mNGS_Illumina
	241_C_T	0,0,0,245	230,0,140,39	0,0,218,285	*	0,0,6734,22
	3037_C_T	0,0,83,331	0,0,2,8	0,2,898,1589	*	0,0,72,28
	10561_T_C	0,0,114,127	0,0,143,0	0,0,441,928	0,1,19,13	0,0,1721,492
	13072_C_T	*	*	441172493190	*	1028172039272
	14408_C_T	1,0,6,166	0,0,10,22	3,1,274,777	3,2,304,242	0,0,3655,71
	15324_C_T	0,0,226,128	0,0,0,40	7,3,2884,1362	0,0,687,645	3,0,16935,5513
	23403_A_G	0,0,919,7	0,0,0,5	2,1,1264,2478	1,0,115,136	0,1,1067,577
	26822_C_T	0,0,2,248	0,0,0,65	0,1,435,553	1,0,694,489	0,0,8335,151
	27382_G_C	0,0,4,411	0,0,0,71	0,0,54,244	0,1,783,646	0,0,502,25
	27383_A_T	0,0,4,405	0,0,0,71	0,0,54,244	3,1,791,721	0,0,505,26
	27384_T_C	0,0,4,410	0,0,0,71	0,0,54,244	13,47,802,704	1,0,503,25
	28844_C_T	0,0,618,542	0,0,9,100	1,2,916,2831	1,0,65,49	0,0,5975,3683
22	26.01	AmpliSeq_Illumina	EasySeq_Illumina	Ion_AmpliSeq	Custom_ONT	Viral_probe_mNGS_Illumina
	241_C_T	0,1,1,704	7,0,3,8	0,0,35,65	*	*
	3037_C_T	0,0,127,558	*	0,0,592,851	*	*
	10273_T_C	0,0,408,350	*	0,0,565,166	*	*
	14408_C_T	4,0,6,369	0,0,0,49	0,1,144,318	0,0,65,54	*
	21817_ATTT_ATT	*	*	3,5,35,0	*	*
	22009_C_T	*	*	*	13,15,25,24	*
	23403_A_G	1,0,2813,29	*	0,0,615,1069	0,0,14,11	*
	27046_C_T	0,0,4,393	*	0,0,170,162	*	*
	28881_G_A	1,0,994,17	0,0,3,8	0,2,155,164	1,1,52,45	0,0,26,5
	28882_G_A	5,0,998,8	0,0,3,8	0,1,155,165	2,1,44,44	0,0,26,5
	28883_G_C	1,0,1005,8	0,0,3,8	0,1,155,165	0,3,49,44	0,0,26,5
	29751_G_C	2,0,0,149	*	0,1,116,299	*	*
23	31.48	AmpliSeq_Illumina	EasySeq_Illumina	Ion_AmpliSeq	Custom_ONT	Viral_probe_mNGS_Illumina
	346_C_T	*	*	0,0,21,5	*	*
	1594_C_T	*	*	0,0,9,6	*	*
	3037_C_T	0,0,3,0	*	0,0,16,10	*	*
	9314_GTTTT_GTTT	*	*	0,2,8,0	*	*
	15032_CAAAA_CAAA	*	*	5,0,1,7	*	*
	16816_CAAA_CAA	*	*	4,0,0,7	*	*
	23403_A_G	0,0,23,1	*	0,0,13,18	*	*
	23525_C_T	*	*	*	0,0,102,112	*
	25563_G_T	*	*	0,0,25,12	*	*
24	27.78	AmpliSeq_Illumina	EasySeq_Illumina	Ion_AmpliSeq	Custom_ONT	Viral_probe_mNGS_Illumina
	241_C_T	0,0,0,17	*	0,0,40,31	*	*
	1059_C_T	0,0,3,0	*	0,0,9,30	*	*
	3037_C_T	0,0,7,26	*	0,0,167,159	*	*
	8626_C_T	*	*	*	19,13,28,101	*
	14408_C_T	*	*	0,0,4,21	0,0,23,21	*
	21658_C_T	*	*	0,0,29,2	*	*
	21817_ATTT_ATT	*	*	5,6,52,0	*	*
	22468_G_T	*	*	0,0,5,27	2,3,1834,2020	*
	23403_A_G	0,0,163,1	*	0,0,220,507	*	*
	25563_G_T	0,0,41,19	*	0,0,316,147	*	*
	29254_G_T	0,0,10,27	0,0,73,0	0,0,5,7	0,1,227,156	0,0,17,0
25	33.6	AmpliSeq_Illumina	EasySeq_Illumina	Ion_AmpliSeq	Custom_ONT	Viral_probe_mNGS_Illumina
	758_C_T	12,3,32,25	*	*	*	*
	2590_A_G	0,0,42,45	*	0,0,56,70	*	*
	4364_A_C	0,0,43,48	*	0,0,53,125	*	*
	6255_C_T	0,0,163,8	*	0,2,44,157	*	*
	6295_A_G	0,0,22,166	*	0,1,50,207	*	*
	8782_C_T	1,0,63,1	*	0,0,168,147	*	*
	9477_T_A	0,0,98,9	*	0,0,246,42	*	*
	9712_C_T	0,0,71,53	*	1,0,217,24	*	*
	11083_G_T	0,0,53,49	*	0,0,18,0	1,2,50,108	*
	11790_T_C	1,0,390,2	*	1,0,335,112	1,2,206,176	*
	13197_C_T	*	*	*	32,37,209,215	*
	14805_C_T	1,0,61,45	*	0,0,136,9	0,0,11,7	*
	16474_A_G	0,0,86,0	*	1,0,106,23	0,1,120,151	*
	21009_T_G	2,0,138,1	*	0,0,223,57	2,2,237,355	*
	21622_C_T	*	*	60,33,103,55	8,16,48,50	*
	22622_A_G	1,0,115,3	*	0,0,32,47	*	*
	23042_T_C	0,0,129,323	*	0,0,159,406	*	*
	23277_C_T	66,18,158,64	*	80,67,210,239	0,4,14,14	*
	24371_T_A	*	*	0,27,1,49	0,0,22,17	*
	25671_C_T	0,0,169,0	*	0,0,167,78	*	0,0,0,5
	25979_G_T	0,0,129,13	*	0,0,236,93	*	*
	26776_C_T	0,0,152,66	*	0,0,104,128	0,2,699,677	*
	26895_C_T	3,0,177,0	*	0,0,317,169	18,8,680,550	*
	28144_T_C	1,0,199,142	*	1,0,308,149	7,1,432,333	*
	28657_C_T	0,0,169,7	*	0,0,8,144	0,0,75,58	*
	28863_C_T	0,1,289,2	*	0,4,70,70	0,0,21,21	*
	29167_C_T	1,1,109,43	*	0,0,26,28	2,0,262,223	*
	29458_T_C	0,57,3,122	*	1,22,7,41	*	*
	29463_C_T	*	*	*	74,86,182,152	*
26	29.99	AmpliSeq_Illumina	EasySeq_Illumina	Ion_AmpliSeq	Custom_ONT	Viral_probe_mNGS_Illumina
	241_C_T	0,0,0,263	*	0,0,137,156	*	0,0,60,28
	3037_C_T	1,0,49,131	*	0,0,1389,1762	*	*
	4543_C_T	1,0,273,0	*	1,0,1662,820	0,0,28,17	*
	5629_G_T	0,0,269,129	*	0,0,1385,798	0,0,33,28	*
	9526_G_T	1,0,53,0	*	0,0,1103,262	0,0,18,18	*
	11189_C_T	*	*	*	*	0,2,26,0
	11497_C_T	0,0,63,1	*	1,1,27,9	0,0,112,129	0,0,27,2
	13993_G_T	2,0,5,137	*	31,31,25,342	1,0,212,151	0,0,15,0
	14408_C_T	0,0,4,164	*	0,3,248,471	0,0,11,11	0,0,59,0
	15766_G_T	0,0,117,6	*	0,0,78,32	2,2,1455,1440	0,0,57,0
	16889_A_G	0,0,282,1	*	1,0,818,657	0,0,18,16	0,0,66,2
	17019_G_T	1,0,214,8	*	0,0,506,332	0,0,20,24	0,0,172,21
	18877_C_T	5,0,204,12	*	2,0,1652,1900	0,0,22,17	0,0,78,2
	22992_G_A	3,0,741,10	*	3,0,1228,1674	*	0,0,3,0
	23403_A_G	1,0,889,7	*	2,0,2189,3734	0,0,33,42	0,0,6,0
	25563_G_T	2,0,1364,426	*	1,0,6805,1026	*	0,0,242,3
	25669_C_T	1,0,356,1	*	4,0,1173,303	*	0,0,29,207
	25710_C_T	0,0,359,1	*	0,0,852,454	*	0,0,2,40
	26735_C_T	0,0,573,27	*	0,0,836,797	3,0,596,616	*
	26876_T_C	1,0,144,0	*	1,0,779,1096	0,16,649,321	0,0,166,2
	27434_C_T	1,0,192,206	*	0,0,555,463	0,0,840,883	0,0,7,0
	28975_G_C	0,0,3,263	*	0,2,68,746	*	0,0,49,31
	29399_G_A	0,0,158,90	*	1,0,127,344	*	0,0,3,18
